# Supplementary material
Source: PubMed Central journal article supplement (PMC11450973)
Supplement: NIHMS2022144-supplement-Supp1.pdf [file NIHMS2022144-supplement-Supp1.pdf]

Supporting Information for the manuscript  
“Formation Enthalpies of C<sub>3</sub> and C<sub>4</sub>  
Brominated Hydrocarbons: Bringing Together  
Classical Thermodynamics, Modern Mass  
Spectrometry, and High-Level *Ab Initio*  
Calculations”

Eugene Paulechka\* and Andrei Kazakov\*

*Thermodynamics Research Center, Applied Chemicals and Materials Division, National  
Institute of Standards and Technology, 325 Broadway, Boulder, CO 80305-3337*

E-mail: [yauheni.paulechka@nist.gov](mailto:yauheni.paulechka@nist.gov); [andrei.kazakov@nist.gov](mailto:andrei.kazakov@nist.gov)

## Computed geometries

The computed geometries for the compounds considered in this work are provided in the compressed folders DFTgeo.zip and MP2geo.zip for B3LYP-D3(BJ)/def2-TZVP and DF-MP2/aug-cc-pVQZ optimizations, respectively. The files are provided in xyz format<sup>1</sup> and include all considered conformations. The file naming follows the identifiers given in Table S1. The table also contains computed enthalpies of formation at 298.15 K and 0 K. **It should be emphasized that the value at 298.15 K is the primary model result. Enthalpies of formation at 0 K were derived from those at 298.15 K using computed  $\Delta_0^T H$  (also listed) and are given solely for the reference.**

## Effect of explicit treatment of internal rotations on thermal enthalpy $\Delta_0^T H$

In the model presented in the main manuscript, a compound was treated as an equilibrium mixture of its conformers with each conformer described with the rigid rotor/harmonic oscillator approximation. Alternatively, the conformers connected via internal rotation can also be described as a single compound with a hindered rotor. Both approaches are approximations. For alkanes, the barriers to internal rotation are reasonably high and the “mixture of conformers” approximation is usually sufficient for evaluation of thermal enthalpy at room temperature. To test the sensitivity to the chosen model for brominated compounds, hindered rotor treatment was considered for two representative cases, 1,2-dibromoethane and 3-bromopropene. Rotational potentials and the corresponding rotational constants were obtained with relaxed rotational angle scans using B3LYP-D3(BJ)/def2-TZVP. The final energies were computed with LCCSD(T)/aug-cc-pVQZ//B3LYP-D3(BJ)/def2-TZVP. The results are shown in Fig. S1.

Rotational potential obtained here for 1,2-dibromoethane agrees with the calculations of

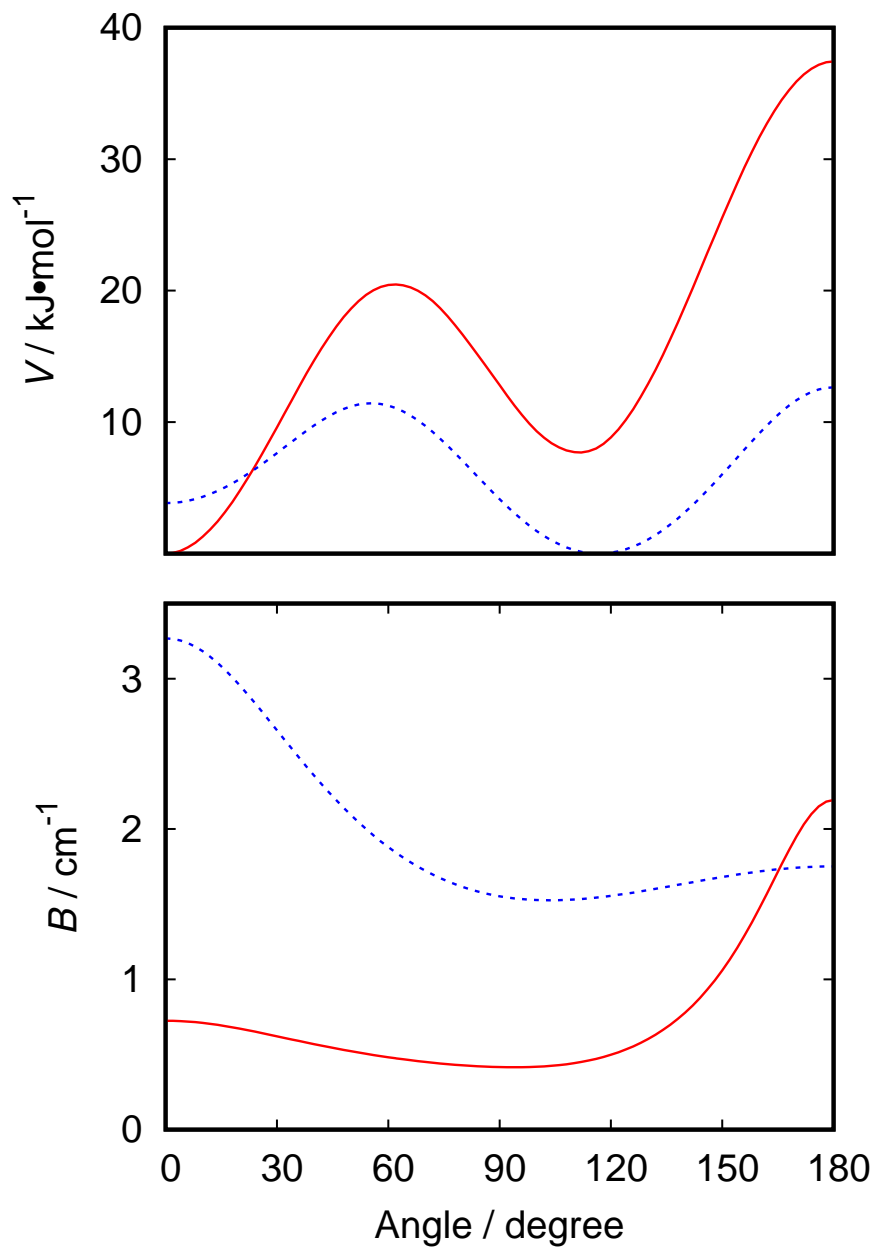

Figure S1: Computed rotational potentials (top) and constants (bottom). Solid (red) line: 1,2-dibromoethane, dotted (blue) line: 3-bromopropene. Rotational constants were evaluated following Pitzer.<sup>2</sup> The portion beyond 180° is omitted due to mirror symmetry.

Wong et al.<sup>3</sup> performed at the similar (CCSD(T)//MP2) level of theory with smaller (cc-pVTZ) basis set. The results for 3-bromopropene are also consistent with G4 calculations of Tucceri et al.<sup>4</sup> The comparison of computed  $\Delta_0^T H$  using two different approaches for both compounds is presented in Table S2.

As seen, the difference between the models is small in both cases.

## References

- (1) XYZ file format. [http://en.wikipedia.org/wiki/XYZ\\_file\\_format](http://en.wikipedia.org/wiki/XYZ_file_format), accessed: October 16, 2023.
- (2) Pitzer, K. S. Energy levels and thermodynamic functions for molecules with internal rotation: II. Unsymmetrical tops attached to a rigid frame. *J. Chem. Phys.* **1946**, *14*, 239–243.
- (3) Wong, B. M.; Fadri, M. M.; Raman, S. Thermodynamic Calculations for Molecules with Asymmetric Internal Rotors. II. Application to the 1,2-Dihaloethanes. *J. Comput. Chem.* **2008**, *29*, 481–487.
- (4) Tucceri, M. E.; Badenes, M. P.; Bracco, L. L.; Cobos, C. J. Thermal Decomposition of 3-Bromopropene. A Theoretical Kinetic Investigation. *J. Phys. Chem. A* **2016**, *120*, 2285–2294.
- (5) Majer, V.; Svoboda, V. *Enthalpies of Vaporization of Organic Compounds: A Critical Review and Data Compilation*; Blackwell Science: Oxford, U.K., 1985.
- (6) Pitzer, K. S.; Curl, R. F. The Volumetric and Thermodynamic Properties of Fluids. III. Empirical Equation for the Second Virial Coefficient. *J. Am. Chem. Soc.* **1957**, *79*, 2369–2370.

**Table S1: Listing of bromine-containing compounds used in computations<sup>a</sup>**

| ID <sup>b</sup> | name                              | CAS registry | $\Delta_f H_m^\circ(298.15\text{ K})^c$ | $\Delta_0^T H$ | $\Delta_f H_m^\circ(0\text{ K})^d$ |
|-----------------|-----------------------------------|--------------|-----------------------------------------|----------------|------------------------------------|
| 01              | hydrogen bromide                  | 10035-10-6   | $-36.1 \pm 2.5$                         | 8.64           | -28.3                              |
| 02              | bromomethane                      | 74-83-9      | $-36.0 \pm 2.5$                         | 10.65          | -20.6                              |
| 03              | bromine fluoride                  | 13863-59-7   | $-59.8 \pm 2.6$                         | 9.02           | -52.1                              |
| 04              | bromoethane                       | 74-96-4      | $-63.7 \pm 2.6$                         | 13.49          | -41.6                              |
| 05              | ( <i>Z</i> )-1-bromopropene       | 590-13-6     | $39.1 \pm 2.6$                          | 15.93          | 59.7                               |
| 06              | ( <i>E</i> )-1-bromopropene       | 590-15-8     | $41.1 \pm 2.6$                          | 16.14          | 61.5                               |
| 07              | 2-bromopropene                    | 557-93-7     | $32.9 \pm 2.6$                          | 15.56          | 53.9                               |
| 08              | 3-bromopropene                    | 106-95-6     | $44.2 \pm 2.6$                          | 15.85          | 64.9                               |
| 09              | bromocyclopropane                 | 4333-56-6    | $79.6 \pm 2.6$                          | 13.93          | 102.2                              |
| 10              | 1-bromopropane                    | 106-94-5     | $-85.6 \pm 2.6$                         | 16.89          | -57.5                              |
| 11              | 2-bromopropane                    | 75-26-3      | $-96.6 \pm 2.6$                         | 16.88          | -68.5                              |
| 12              | bromodifluoromethane              | 1511-62-2    | $-424.0 \pm 2.6$                        | 13.04          | -410.7                             |
| 13              | bromocyclobutane                  | 4399-47-7    | $32.6 \pm 2.6$                          | 16.38          | 62.4                               |
| 14              | 1-bromo-2-methylpropane           | 78-77-3      | $-114.3 \pm 2.6$                        | 20.47          | -80.2                              |
| 15              | 2-bromo-2-methylpropane           | 507-19-7     | $-131.7 \pm 2.6$                        | 20.40          | -97.5                              |
| 16              | 1-bromobutane                     | 109-65-9     | $-106.2 \pm 2.6$                        | 21.14          | -72.8                              |
| 17              | 2-bromobutane                     | 78-76-2      | $-117.9 \pm 2.6$                        | 21.55          | -84.9                              |
| 18              | bromotrifluoromethane             | 75-63-8      | $-649.5 \pm 2.8$                        | 14.64          | -637.5                             |
| 19              | bromine                           | 7726-95-6    | $34.7 \pm 2.6$                          | 9.74           | 49.5                               |
| 20              | 2-bromophenol                     | 95-56-7      | $-76.1 \pm 2.6$                         | 20.60          | -52.7                              |
| 21              | 4-bromophenol                     | 106-41-2     | $-67.6 \pm 2.6$                         | 20.90          | -44.4                              |
| 22              | 1-bromo-2-methoxybenzene          | 578-57-4     | $-41.0 \pm 2.6$                         | 25.54          | -12.9                              |
| 23              | 1-bromo-3-methoxybenzene          | 2398-37-0    | $-48.0 \pm 2.6$                         | 24.82          | -19.2                              |
| 24              | 1-bromo-4-methoxybenzene          | 104-92-7     | $-46.3 \pm 2.6$                         | 24.53          | -17.2                              |
| 25              | 1,2-dibromoethane                 | 106-93-4     | $-39.1 \pm 2.7$                         | 17.03          | -12.6                              |
| 26              | 4 <sup>i</sup> -bromoacetophenone | 99-90-1      | $-60.1 \pm 2.7$                         | 27.11          | -32.6                              |
| 27              | 4-bromobenzoic acid               | 586-76-5     | $-271.6 \pm 2.8$                        | 25.20          | -247.3                             |
| 28              | 1,1-dibromopropane                | 598-17-4     | $-53.9 \pm 2.7$                         | 20.18          | -21.0                              |
| 29              | 1,2-dibromopropane                | 78-75-1      | $-72.7 \pm 2.7$                         | 20.53          | -40.2                              |
| 30              | 1,3-dibromopropane                | 109-64-8     | $-64.1 \pm 2.7$                         | 20.84          | -31.8                              |
| 31              | 2,2-dibromopropane                | 594-16-1     | $-68.3 \pm 2.7$                         | 20.11          | -35.4                              |
| 32              | 1,2-dibromobutane                 | 533-98-2     | $-94.6 \pm 2.7$                         | 24.79          | -56.8                              |
| 33              | 1,3-dibromobutane                 | 107-80-2     | $-97.7 \pm 2.7$                         | 24.93          | -60.0                              |
| 34              | 1,4-dibromobutane                 | 110-52-1     | $-86.2 \pm 2.7$                         | 24.96          | -48.6                              |
| 35              | <i>meso</i> -2,3-dibromobutane    | 5780-13-2    | $-102.5 \pm 2.7$                        | 24.05          | -64.0                              |
| 36              | <i>dl</i> -2,3-dibromobutane      | 598-71-0     | $-103.3 \pm 2.7$                        | 24.26          | -65.0                              |
| 37              | 1,2-dibromo-2-methylpropane       | 594-34-3     | $-107.8 \pm 2.7$                        | 24.17          | -69.4                              |
| 38              | 1,3-dibromo-2-methylpropane       | 28148-04-1   | $-93.0 \pm 2.7$                         | 24.46          | -54.9                              |
| 39              | 2,3-dibromo-2-methylbutane        | 594-51-4     | $-134.6 \pm 2.7$                        | 27.82          | -90.3                              |
| 40              | 2-bromofluorene                   | 1133-80-8    | $209.2 \pm 2.9$                         | 30.28          | 242.9                              |
| 41              | 2,6-dibromophenol                 | 608-33-3     | $-46.0 \pm 2.8$                         | 24.36          | -18.2                              |
| 42              | tribromomethane                   | 75-25-2      | $57.4 \pm 2.8$                          | 16.11          | 83.4                               |
| 43              | 1,2-dibromotetrafluoroethane      | 124-73-2     | $-804.4 \pm 3.0$                        | 25.07          | -785.2                             |

<sup>a</sup>values are given in kJ·mol<sup>-1</sup>; <sup>b</sup>compound identifier used to label the provided xyz files; <sup>c</sup>computed; <sup>d</sup>derived from computed  $\Delta_f H_m^\circ(298.15\text{ K})$  and  $\Delta_0^T H$

**Table S2:**  $\Delta_0^T H$  computed with the “mixture-of-conformers” and hindered-rotor models

| compound          | $\Delta_0^T H / \text{kJ}\cdot\text{mol}^{-1}$ |                |
|-------------------|------------------------------------------------|----------------|
|                   | mixture of conformers                          | hindered rotor |
| 1,2-dibromoethane | 17.0                                           | 17.3           |
| 3-bromopropene    | 15.9                                           | 16.0           |

**Table S3:** Non-ideality correction to the enthalpies of vaporization at  $T = 298.15 \text{ K}$  ( $\text{kJ}\cdot\text{mol}^{-1}$ )

| compound                    | Majer and Svoboda <sup>5</sup> | This work <sup>a</sup> |
|-----------------------------|--------------------------------|------------------------|
| tribromomethane             | 0.01                           | 0.01                   |
| bromomethane                | 0.43                           | 0.34 <sup>b</sup>      |
| bromoethane                 | 0.23                           | 0.16 <sup>b</sup>      |
| 1-bromopropane              | 0.12                           | 0.11 <sup>c</sup>      |
| 2-bromopropane              | 0.16                           | 0.15 <sup>b</sup>      |
| 3-bromopropene              | 0.12                           | 0.10                   |
| 1,2-dibromopropane          | 0.02                           | 0.02                   |
| 1,3-dibromopropane          | 0.01                           | 0.01                   |
| 1-bromobutane               | 0.07                           | 0.06                   |
| 2-bromobutane               | 0.10                           | 0.07                   |
| 1-bromo-2-methylpropane     | 0.08                           | 0.07                   |
| 2-bromo-2-methylpropane     | 0.12                           | 0.12                   |
| 1,4-dibromobutane           | 0.00                           | 0.00                   |
| 1,2-dibromo-2-methylpropane | 0.02                           | 0.02                   |

<sup>a</sup>unless specified otherwise, second virial coefficients  $B_{2,m}$  are estimated with the Pitzer-Curl method<sup>6</sup> and vapor pressures are evaluated by NIST TDE; <sup>b</sup> $B_{2,m}$  are evaluated by NIST TDE using the available experimental data; <sup>c</sup>both experimental data and Pitzer-Curl predictions are used in the  $B_{2,m}$  evaluation
